# Supplementary material
Source: PubMed Central journal article supplement (PMC3193498)
Supplement: cr201135x2.pdf [file cr201135x2.pdf]

## Supplementary information, Figure S2

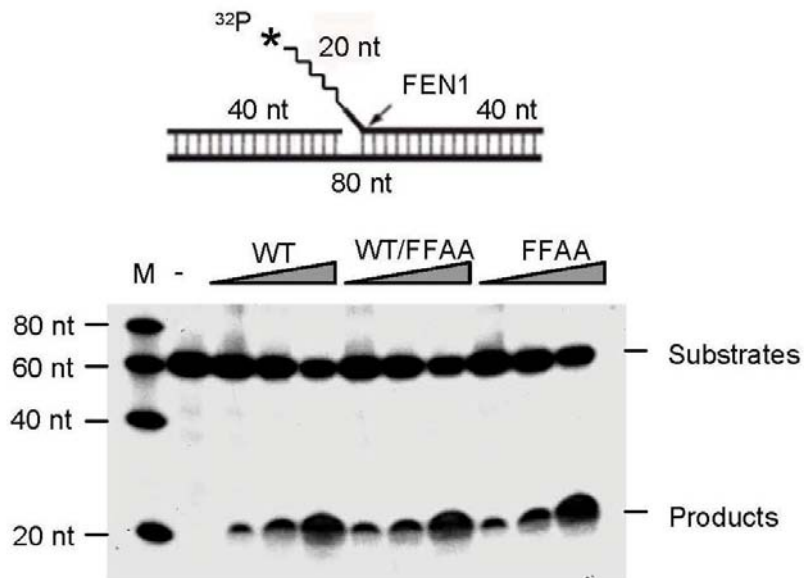

**Figure S2** FFAA nuclease extracts (NEs) displayed similar flap cleavage activities to the WT NEs. To assay the 5' flap endonuclease activity, we prepared a gap substrate containing a 5' end  $^{32}\text{P}$ -labeled 20 nt RNA-DNA flap (which consists of 17 ribonucleotides and 3 deoxyribonucleotides), (upper panel). Nuclear extracts (0.25  $\mu\text{g}$ , 0.5  $\mu\text{g}$ , or 1  $\mu\text{g}$ ) of the indicated cells were incubated with the indicated DNA substrates (1 pmol). All reactions were carried out at 37  $^{\circ}\text{C}$  for 15 min. Substrates and products were analyzed by 15% denaturing PAGE.
