# Supplementary material
Source: PubMed Central journal article supplement (PMC3193498)
Supplement: cr201135x3.pdf [file cr201135x3.pdf]

## Supplementary information, Figure S3

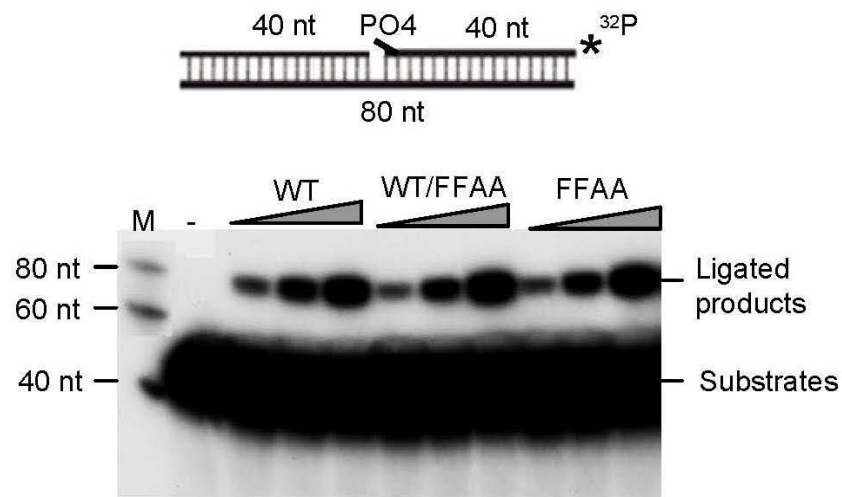

**Figure S3** FFAA nuclease extracts (NEs) had similar ligation activities to the WT NEs on the nicked DNA substrates. To assay the ligation activity, we prepared a 3' end  $^{32}\text{P}$ -labeled nick substrate (upper panel). The downstream oligo nucleotide was phosphorylated to allow a simple DNA ligation reaction. Nuclear extracts (0.25  $\mu\text{g}$ , 0.5  $\mu\text{g}$ , or 1  $\mu\text{g}$ ) of the indicated cells were incubated with the indicated DNA substrates (1 pmol). All reactions were carried out at 37  $^{\circ}\text{C}$  for 15 min and analyzed by 15% denaturing PAGE.
