# Supplementary material
Source: PubMed Central journal article supplement (PMC3193498)
Supplement: cr201135x4.pdf [file cr201135x4.pdf]

Supplementary information, Figure S4

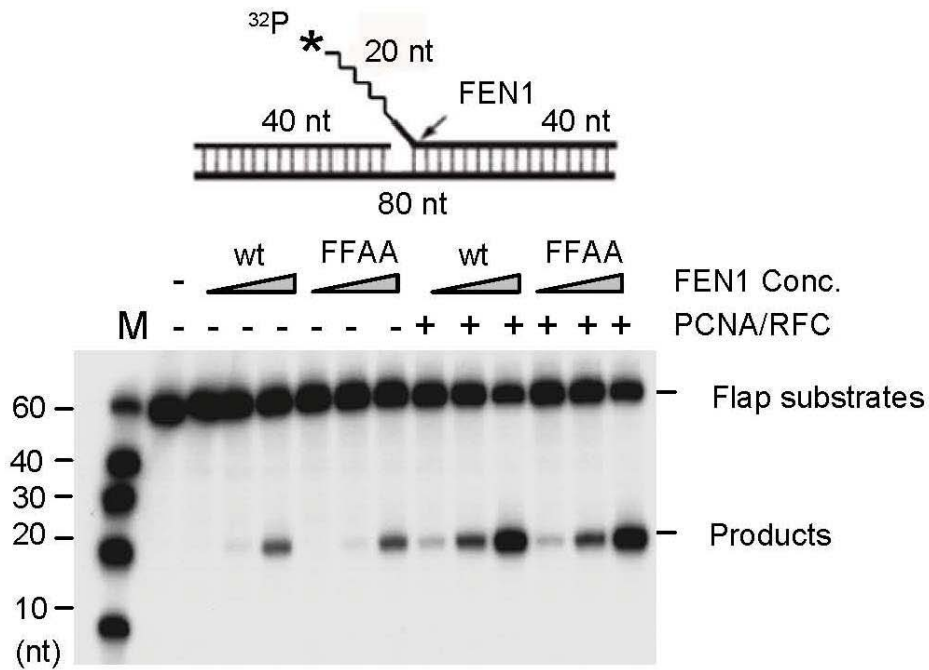

**Figure S4** Purified recombinant FFAA FEN1 proteins have similar FEN1 activity as the WT FEN1. 500 fmol 5' end  $^{32}\text{P}$ -labeled RNA-DNA flap substrates were incubated with 20, 50, or 100 fmol purified recombinant WT or FFAA FEN1 proteins in the absence or presence of PCNA or RFC (300 fmol each). All reactions were carried out at 37 °C for 15 min and analyzed by 15% denaturing PAGE.
