# Supplementary material
Source: PubMed Central journal article supplement (PMC3193498)
Supplement: cr201135x5.pdf [file cr201135x5.pdf]

## Supplementary information, Figure S5

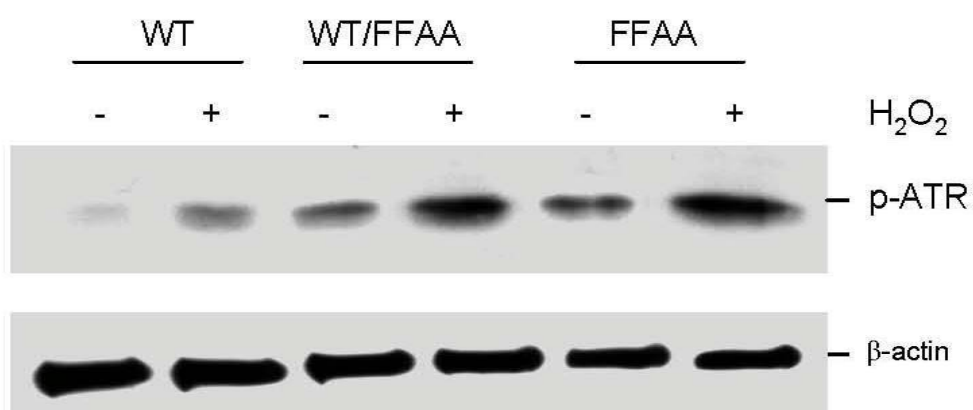

**Figure S5** ATR was activated in the FFAA cells spontaneously or in response to treatments with H<sub>2</sub>O<sub>2</sub>. Activation of ATR was determined by Western blotting analysis. WT, WT/FFAA, or FFAA/FFAA MEF cells were untreated or treated with 1 mM H<sub>2</sub>O<sub>2</sub> (15 min). Nuclear extracts were prepared and were resolved in 4-15% SDS-PAGE (20 μg each sample). The phospho-ATR (active form) was detected by Western blot using an antibody against phospho-ATR (S428) (Cell signaling). β-actin was used as a loading control.
